# Supplementary material
Source: publisher figshare collection journal article supplement (https://tandf.figshare.com/ndownloader/files/17592290)
Supplement: Supplementary file 1 [file 17592290]

# Preparation, preliminary pharmacokinetics and brain tissue distribution of Tanshinone IIA and Tetramethylpyrazine composite nanoemulsions

Beilei Wang<sup>1#</sup>, Lufeng Hong<sup>1#</sup>, Yuanxu Liu<sup>1</sup>, Sean K. Bedingfield<sup>2</sup>, Caiyun Zhang<sup>1\*</sup>, Can Peng<sup>1\*</sup>, Jiajia Qian<sup>1</sup>, Liqiong Zha<sup>1</sup>

1 School of Pharmacy, Anhui University of Chinese Medicine, Anhui Academy of Chinese Medicine, Hefei 230012, Anhui, China

2 Department of Biomedical Engineering, Vanderbilt University, 5824 Stevenson Center, PMB 351631, 2301 Vanderbilt Place, Nashville, TN 37235-1631, USA

#These authors contributed to the work equally and should be regarded as co-first authors.

\*Address correspondence to [cyzhang6@ustc.edu.cn](mailto:cyzhang6@ustc.edu.cn) and [pengcan@ahtcm.edu.cn](mailto:pengcan@ahtcm.edu.cn).

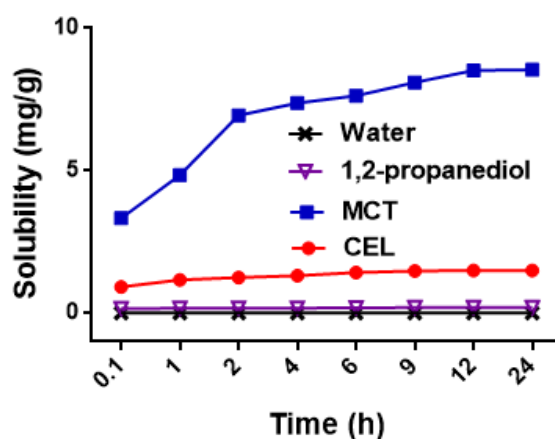

Figure .S1. The solubility of TSN in different solvent.

The solubility of TSN in MCT was  $8.76 \pm 0.42$  mg/g higher than other solvents. And TSN is almost insoluble in water and 1,2-propanediol.

Table .S1 The different percentages of MCT, Km and Water for pseudo-ternary phase diagram of

NEs

|   | MCT (%) | Km=3:1 (%) | Water (%) |
|---|---------|------------|-----------|
| □ | 8.18    | 0.91       | 90.91     |
| □ | 7.27    | 1.82       | 90.91     |
| □ | 6.36    | 2.73       | 90.91     |
| □ | 30.00   | 20         | 50        |
| □ | 33.33   | 33.33      | 33.34     |
| □ | 26.67   | 40         | 33.33     |
| □ | 16.67   | 38.89      | 44.44     |
| □ | 1.82    | 7.27       | 90.91     |
| □ | 0.91    | 8.18       | 90.91     |

Different percentages of MCT, Km and water as shown in Tab. S1 were designed to form the pseudo-ternary phase diagram.

## Graphical abstract

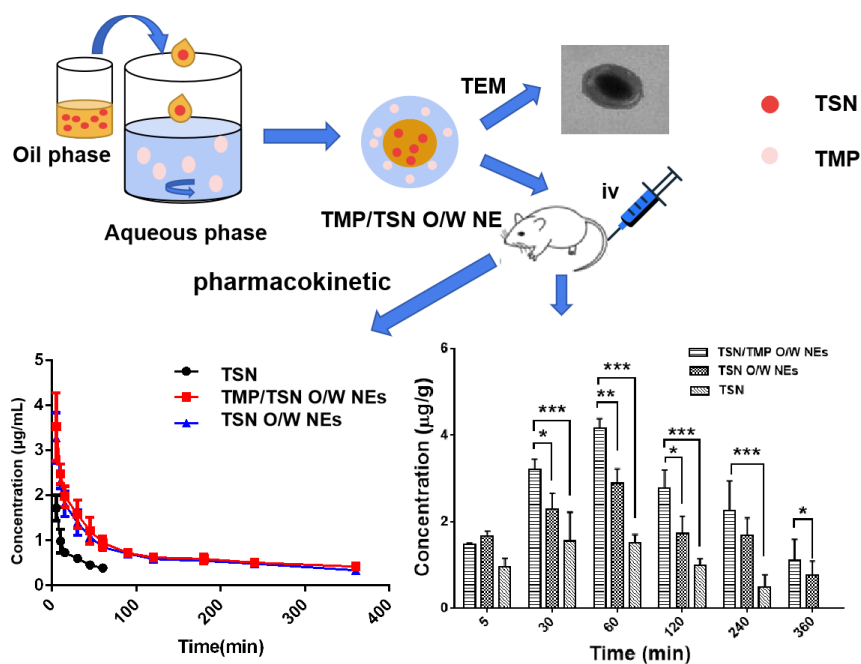

In this work, Tetramethylpyrazine and Tanshinone IIA composite nanoemulsions (TMP/TSN O/W NEs) was prepared with stirring method successfully. The nanoemulsion loaded with TSN and TMP exhibited excellent stability. The pharmacokinetic study demonstrated that TMP/TSN O/W NE improve bioavailability of TSN and enhance distribution in brain compared with raw TSN.
